# Supplementary material
Source: Royal Society of Chemistry journal article supplement (doi:10.1039/d6ay00556j)
Supplement: d6ay00556j1.pdf [file d6ay00556j1.pdf]

## Supporting material

### **Engineering a Nanobody-Alkaline Phosphatase Bifunctional Probe for Enhanced Immunoassay Performance toward Microcystin-LR**

Yingying Ma<sup>1, 2, †</sup>, Tong Ai<sup>1, †</sup>, Xinyi Chen<sup>1</sup>, Rui Zhang<sup>1</sup>, Ruoyu Li<sup>1</sup>, Hanlin Jin<sup>1</sup>, Yurun Pei<sup>1</sup>, Peng Liu<sup>3, \*</sup>, Jie Luo<sup>4, \*</sup>, Qi Chen<sup>1, \*</sup>

1 National Engineering Research Center for Bioengineering Drugs and the Technologies, Jiangxi Provincial Key Laboratory of Bioengineering Drugs, Institute of Translational Medicine, Jiangxi Medical College, Nanchang University, Nanchang 330031, China

2 School of Stomatology, Jiangxi Provincial Key Laboratory of Oral Diseases, Jiangxi Provincial Clinical Research Center for Oral Diseases, Jiangxi Medical College, Nanchang University, Nanchang 330031, China

3 Department of Clinical Laboratory, The First Affiliated Hospital, Jiangxi Medical College, Nanchang University, Nanchang 330006, China

4 School of Public Health, Jiangxi Medical College, Nanchang University, Nanchang 330031, China, Jiangxi Medical College, Nanchang University, Nanchang 330031, China

† These authors contributed equally to this work.

\* Correspondence: [ndyfy06531@ncu.edu.cn](mailto:ndyfy06531@ncu.edu.cn); [jieluo@ncu.edu.cn](mailto:jieluo@ncu.edu.cn); [qichen@ncu.edu.cn](mailto:qichen@ncu.edu.cn)

## Table of contents

|                                                                                                                            |     |
|----------------------------------------------------------------------------------------------------------------------------|-----|
| <b>Figure.S1</b> The identification of the coating antigen (MC-LR-BSA).....                                                | S-1 |
| <b>Table.S1</b> The gene sequences encoding the anti-MC-LR nanobody (A2.3) and alkaline phosphatase (AP).....              | S-2 |
| <b>Table.S2</b> The amino acid sequence of the A2.3-AP bifunctional probe.....                                             | S-3 |
| <b>Table.S3</b> The optimization of pNPP concentration.....                                                                | S-4 |
| <b>Figure.S2</b> The storage stability analysis of the developed A2.3-AP bifunctional probe.....                           | S-5 |
| <b>Table.S4.</b> The optimization of concentrations of the coating antigen (MC-LR-BSA) and A2.3-AP bifunctional probe..... | S-5 |
| <b>Table.S5.</b> The cross-reactivity rate of common microcystins .....                                                    | S-6 |

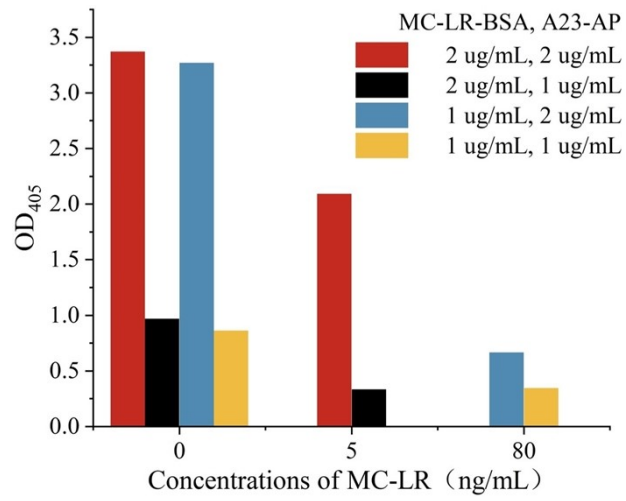

**Figure.S1** The identification of the coating antigen (MC-LR-BSA)

**Table S1.** The gene sequences encoding the anti-MC-LR nanobody (A2.3) and alkaline phosphatase (AP)

| Name      | Gene Sequence                                                                                                                                                                                                                                                                                                                                                                                                                                                                                                                                                                                                                                                                                                                                                                                                                                                                                                                                                                                                                                                                                                                                                                                                                                                                                                                                                                                                                                                                                                                                                                                                                                                                                                                                           |
|-----------|---------------------------------------------------------------------------------------------------------------------------------------------------------------------------------------------------------------------------------------------------------------------------------------------------------------------------------------------------------------------------------------------------------------------------------------------------------------------------------------------------------------------------------------------------------------------------------------------------------------------------------------------------------------------------------------------------------------------------------------------------------------------------------------------------------------------------------------------------------------------------------------------------------------------------------------------------------------------------------------------------------------------------------------------------------------------------------------------------------------------------------------------------------------------------------------------------------------------------------------------------------------------------------------------------------------------------------------------------------------------------------------------------------------------------------------------------------------------------------------------------------------------------------------------------------------------------------------------------------------------------------------------------------------------------------------------------------------------------------------------------------|
| A2.3 gene | <p>CAGGTGACCCTGAAAGAGAGCGGCGGTGGCTTAGTGCAACCGGGCGGCAGCTTACGCCTGAGC<br/>           TGC GCGGCGAGCGGCGGCATCAGCCGCGTTAATGTGGCCGGCTGGTATCGCCAAGCGCCGGGT<br/>           CAGCAGCGCGAAATGGTGGCGGTGATTCGCAGCGGCGGCCGATTAACTATGCGGATTTTGTG<br/>           AAAGGCCGCTTTACCTTTAGCCGCGATGATGCGAAACAGACCATTTATCTGCAGATGGATAACC<br/>           TGAAAAGCGAAGATACCGCGGTGTATTATTGCTATGGCAGCCTGCTGGAAACCGGCACCTTCA<br/>           GTATCGCGAATATTGGGGTCAGGGGACCCAGGTCACCGTCTCCTCA</p>                                                                                                                                                                                                                                                                                                                                                                                                                                                                                                                                                                                                                                                                                                                                                                                                                                                                                                                                                                                                                                                                                                                                                                                                                                                                                       |
| AP gene   | <p>ACACCAGAAATGCCTGTTCTGGAAAACCGGGCTGCTCAGGGCGATATTACTGCACCCGGCGGT<br/>           GCTCGCCGTTTAAACGGGTGATCAGACTGCCGCTCTGCGTGATTCTCTTAGCGATAAACCTGCAA<br/>           AAAATATTATTTTGCTGATTGGCGATGGGATGGGGGACTCGGAAATTACTGCCGCACGTAATTA<br/>           TGCCGAAGGTGCGGGCGGCTTTTTTAAAGGTATAGATGCCTTACCGCTTACCGGGCAATACACT<br/>           CACTATGCGCTGAATAAAAAAACCGCAAACCGGACTACGTCACCGACTCGGCTGCATCAGCA<br/>           ACCGCTGGTCAACCGGTGTAAAACCTATAACGGCGCGCTGGGCGTCGATATTCACGAAAAA<br/>           GATCACCCAACGATTCTGGAAATGGCAAAGCCGCAGGTCTGGCGACCGGTAACGTTTCTACC<br/>           GCAGAGTTGCAGGGCGCCACGCCGCTGCGCTGGTGGCACATGTGACCTCGCGCAAATGCTAC<br/>           GGTCCGAGCGCGACCAGTGAAAAATGTCCGGGTAACGCTCTGGAAAAAGGCGGAAAAAGGATC<br/>           GATTACCGAACAGCTGCTTAACGCTCGTGCCGACGTTACGCTTGGCGGCGGGCGAAAAACCTTT<br/>           GCTGAAACGGCAACCGCTGGTGAATGGCAGGGAAAAACGCTGCGTGAACAGGCACAGGCGCG<br/>           TGGTTATCAGTTGGTGAGCGATGCTGCCTCACTGAATTCGGTGACGGAAGCGAATCAGCAAAA<br/>           ACCCCTGCTTGGCCTGTTTGCTGACGGCAATATGCCAGTGCGCTGGCTAGGACCGAAAGCAACG<br/>           TACCATGGCAATATCGATAAGCCCGCAGTCACCTGTACGCCAAATCCGCAACGTAATGACAGTG<br/>           TACCAACCCTGGCGCAGATGACCGACAAAGCCATTGAATTGTTGAGTAAAAATGAGAAAGGCT<br/>           TTTTCCTGCAAGTTGAAGGTGCGTCAATCGATAAACAGAATCATGCTGCGAATCCTTGTGGGCA<br/>           AATTGGCGAGACGGTCGATCTCGATGAAGCCGTACAACGGGCGCTGGAATTCGCTAAAAAGGA<br/>           GGGTAACACGCTGGTCATAGTCACCGCTGATCACGCCACGCCAGCCAGATTGTTGCGCCGGAT<br/>           ACCAAAGCTCCGGGCCTCACCCAGGCGCTAAATACCAAAGATGGCGCAGTGATGGTGATGAGT<br/>           TACGGGAACTCCGAAGAGGATCACAAAGAACATAACCGGCAGTCAGTTGCGTATTGCGGCGTAT<br/>           GGCCCGCATGCCGCAATGTTGTTGGACTGACCGACCAGACCGATCTCTTCTACACCATGAAAAG<br/>           CCGCTCTGGGGCTGAAA</p> |

**Table S2.** The amino acid sequence of the A2.3-AP bifunctional probe

| Name                                                                            | Sequence                                                                                                                                                                                                                                                                                                                                                                                                                                                                                                                                                                                                                                                                                  |
|---------------------------------------------------------------------------------|-------------------------------------------------------------------------------------------------------------------------------------------------------------------------------------------------------------------------------------------------------------------------------------------------------------------------------------------------------------------------------------------------------------------------------------------------------------------------------------------------------------------------------------------------------------------------------------------------------------------------------------------------------------------------------------------|
| A2.3-AP bifunctional probe: A2.3 sequence labeled in blue and AP labeled in red | QVTLKESGGGLVQPGGSLRLSCAASGGISRVNVAGWYRQAPGQQREMVAVIR<br>SGGRINYADFKVGRFTFSRDDAKQTIYLLQMDNLKSEDTAVYYCYGSLLLETGTF<br>QYREYWGQGTQVTVSSKLAALAALEGGGGSGGGGSGGGGSTPEMPVLENRAAQ<br>GDITAPGGARRLTGDQTAALRDSLSDKPAKNIILLIGDGMGDSEITAARNYAEG<br>AGGFFKGIDALPLTGQYTHYALNKKTKGKPDVTDASAATAWSTGVKTYNGAL<br>GVDIHEKDHPTILEMAKAAGLATGNVSTAELQGATPAALVAHVTSRKCYGPSA<br>TSEKCPGNALEKGGKGSITEQLLNARADVTLGGGAKTFAETATAGEWQKTLR<br>EQAQARGYQLVSDAASLNSVTEANQQKPLLGLFADGNMPVRWLGPKATYHGN<br>IDKPAVTCTPNPQRNDSVPTLAQMTDKAIELLSKNEKGFFLQVEGASIDKQNHAA<br>NPCGQIGETVDLDEAVQRALEFAKKEGNTLVIVTADHAHASQIVAPDTKAPGLTQ<br>ALNTKDGAVMVMSYGNSEEDSQEHTGSQLRIAAYGPHAANVVGLTDQTDLFYT<br>MKAALGLKLEIKRASQPELAPEDPEDVEHHHHHH* |

**Table S3.** The optimization of pNPP concentration

| pNPP (mg/ml) | A2.3-AP( $\mu\text{g/mL}$ ) |       |                    |       |                    |       |                    |       |                    |       | Control Group |
|--------------|-----------------------------|-------|--------------------|-------|--------------------|-------|--------------------|-------|--------------------|-------|---------------|
|              | 5                           |       | 2.5                |       | 1.25               |       | 0.6125             |       | 0.30625            |       |               |
|              | Experimental Group          | Ratio | Experimental Group | Ratio | Experimental Group | Ratio | Experimental Group | Ratio | Experimental Group | Ratio |               |
| 8            | 3.0035                      | 12    | 3.7072             | 15    | 3.5764             | 14    | 3.0034             | 12    | 3.544              | 14    | 0.2508        |
| 4            | 3.6912                      | 23    | 3.7287             | 23    | 3.6976             | 23    | 3.5722             | 22    | 3.1983             | 20    | 0.1624        |
| 2            | 3.6612                      | 33    | 3.7093             | 33    | 3.6710             | 33    | 3.4793             | 31    | 2.9709             | 27    | 0.1121        |
| 1            | 3.5412                      | 38    | 3.3516             | 36    | 3.6013             | 39    | 3.1876             | 34    | 2.5287             | 27    | 0.0934        |
| 0.5          | 3.3533                      | 36    | 2.3576             | 25    | 2.6631             | 29    | 2.4046             | 26    | 1.7659             | 19    | 0.0931        |

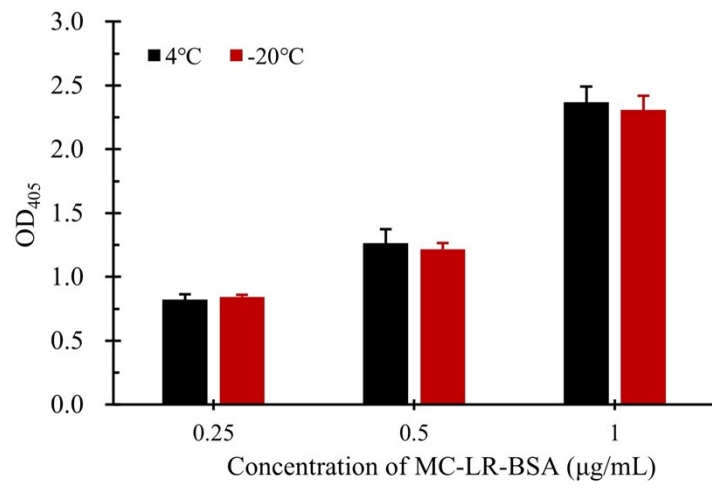

**Figure.S2** The storage stability analysis of the developed A2.3-AP bifunctional probe

**Table S4.** The optimization of concentrations of the coating antigen (MC-LR-BSA) and A2.3-AP bifunctional probe

| MC-LR-BSA<br>( $\mu\text{g/mL}$ ) | A2.3-AP ( $\mu\text{g/mL}$ ) |       |       |       |
|-----------------------------------|------------------------------|-------|-------|-------|
|                                   | 4                            | 2     | 1     | 0.5   |
| 4                                 | 3.679                        | 3.685 | 1.168 | 0.355 |
| 2                                 | 2.398                        | 1.606 | 0.744 | 0.313 |
| 1                                 | 2.371                        | 1.513 | 0.793 | 0.289 |
| 0.5                               | 1.217                        | 1.263 | 0.698 | 0.287 |

**Table S5.** The cross-reactivity rate of common microcystins

| <b>Analyte</b> | <b>IC<sub>50</sub><br/>(ng/mL)</b> | <b>CR (%)</b> |
|----------------|------------------------------------|---------------|
| <b>MC-LR</b>   | 20.86                              | 100.00%       |
| <b>MC-RR</b>   | 16.09                              | 129.65%       |
| <b>MC-WR</b>   | 22.52                              | 92.63%        |
| <b>MC-LY</b>   | 80.89                              | 25.79%        |
| <b>MC-LW</b>   | 178.61                             | 11.68%        |
